# Endothelin B receptor $Ca^{2+}$ signaling in shark vascular smooth muscle: participation of inositol trisphosphate and ryanodine receptors

Susan K. Fellner<sup>1,2,\*</sup> and Laurel A. Parker<sup>2</sup>

<sup>1</sup>Department of Cell and Molecular Physiology, University of North Carolina at Chapel Hill, Chapel Hill, NC 27599, USA and <sup>2</sup>Mount Desert Island Biological laboratory, Salisbury Cove, ME 04672, USA

\*Author for correspondence (e-mail: sfellner@med.unc.edu)

Accepted 10 June 2004

## Summary

In mammals, endothelin receptors are sub-classified into  $ET_A$  receptors ( $ET_{AR}$ ), which are purely constrictive in vascular smooth muscle (VSM), and  $ET_B$ R, which may produce constriction in VSM or dilatation by stimulating the production of nitric oxide (NO) from endothelial cells. In contrast, previous studies suggested that shark VSM is stimulated exclusively by  $ET_B$ R. The  $Ca^{2+}$  signaling pathways utilized by shark VSM in response to stimulation by endothelin-1 (ET-1) have not previously been investigated. We measured cytosolic  $Ca^{2+}$  concentration ( $[Ca^{2+}]_i$ ) in fura-2-loaded VSM of anterior mesenteric artery of *Squalus acanthias* and show that the  $ET_B$ R agonists IRL 1620 and sarafotoxin S6c (SRX) increase  $[Ca^{2+}]_i$  in VSM to the same extent as ET-1 and  $ET_B$ R appears to be the only ETR subtype in sharks. To investigate the participation of the inositol trisphosphate ( $IP_3$ ) receptors ( $IP_3R$ ), we utilized two inhibitors of the

mammalian  $IP_3R$ , TMB-8 and 2-APB. In  $Ca^{2+}$ -free Ringer, these agents inhibit the response to  $ET_B$ R agonist stimulation by 71%. The ryanodine-sensitive receptor (RyR) may be activated by low concentrations of ryanodine, by abrupt local increases of  $[Ca^{2+}]_i$ , (calcium-induced calcium release) or by cyclic adenediphosphate ribose (cADPR). We employed three inhibitors of activation of the RyR, Ruthenium Red, 8-Br cADPR and high concentrations of ryanodine; these agents blocked the  $[Ca^{2+}]_i$  response to  $ET_B$ R agonist stimulation by a mean of 39%. These data show for the first time that in VSM of the shark,  $ET_B$ R activation stimulates both  $IP_3R$  and RyR, and that cADPR is involved in RyR activation.

Key words: calcium signaling, elasmobranch, cADPR, ryanodine,  $IP_3$ , dogfish shark, *Squalus acanthias*.

## Introduction

The mechanisms by which agonist stimulation of vascular smooth muscle (VSM) in *Squalus acanthias* increases cytosolic  $Ca^{2+}$  concentration ( $[Ca^{2+}]_i$ ) to initiate contraction have not been studied. Previously we presented evidence for activity of a ryanodine-sensitive receptor (RyR) and an inositol trisphosphate ( $IP_3$ ) receptor ( $IP_3R$ ) in VSM of the rectal gland artery of *S. acanthias* (Fellner and Parker, 2002). We noted activation of the  $IP_3R$  following stimulation of a polycationic sensing receptor with  $Ca^{2+}$ , spermine or gadolinium, as has been shown in mammalian tissues (Conigrave et al., 2000). A RyR had previously been demonstrated in dogfish ventricles (Thomas et al., 1996), but its function in shark VSM has not been investigated.

Endothelin is considered to be among the most potent initiators of vascular contraction in mammalian species (Yanagisawa et al., 1988); its receptors are sub-classified into  $ET_A$ R and  $ET_B$ R. In mammals, activation of the  $ET_A$ R on VSM is purely constrictive, whereas stimulation of  $ET_B$ R may cause either dilatation, by promoting the release of nitric oxide (NO) and sometimes prostacyclin from endothelial cells, or

constriction of VSM (D'Orleans-Juste et al., 2002). In *S. acanthias*, VSM of the ventral aorta and anterior mesenteric artery appears to respond to  $ET_B$ R but not  $ET_A$ R agonist stimulation (Evans, 2001). The  $ET_B$ R-specific agonist sarafotoxin S6c (SRX) was as constrictive as endothelin-1 (ET-1) to arterial rings.

In mammals, ET-1 has been shown to mobilize  $Ca^{2+}$  from the endoplasmic (ER) or sarcoplasmic reticulum (SR) via activation of both the  $IP_3R$  and RyR (Shimoda et al., 2000). Cyclic ADP-ribose (cADPR) is synthesized from nicotinamide adenine dinucleotide (NAD) following ET-1 stimulated ADP-ribosyl cyclase activity. Then cADPR activates the RyR, causing a release of  $Ca^{2+}$  from the endoplasmic or sarcoplasmic reticulum. Involvement of cADPR in ET-1 induced contraction has been demonstrated in rat mesenteric small arteries (Giuliumian et al., 2000). However, whether both  $ET_A$ R and  $ET_B$ R activation signals involve both  $IP_3R$  and RyR activation in VSM is unknown. In rat peritubular smooth muscle of seminiferous tubules,  $ET_A$ R activation involves both  $IP_3R$  and RyR whereas  $ET_B$ R works exclusively through the

RyR *via* formation of cADPR (Barone et al., 2002). That the dogfish shark appears to have only ET<sub>B</sub>R on VSM of the aorta and anterior mesenteric artery raises the question of whether ET<sub>B</sub>R signals through both IP<sub>3</sub>R and RyR or exclusively through RyR. Thus investigating the participation of these SR receptors in shark may answer important questions applicable to all vertebrate VSM. We have utilized the specific ET<sub>B</sub>R agonists IRL-1620 and SRX to explore the involvement of IP<sub>3</sub>R and RyR activation in the anterior mesenteric artery of *S. acanthias*.

### Materials and methods

Sharks *Squalus acanthias* L. (2–3 kg) of both sexes were caught in Frenchman Bay, Maine, USA, and kept in running seawater tanks (11–15°C early to late summer) until the animals were pithed through the snout and killed. This protocol was approved by the Institutional Animal Care Committee at Mount Desert Island Biological Laboratory, Salisbury Cove, ME, USA.

The anterior mesenteric artery was dissected and placed in ice-cold Ca<sup>2+</sup>-free shark Ringer (pH 7.7) containing, in mmol l<sup>-1</sup>, NaCl, 275; KCl, 4; MgCl<sub>2</sub>, 3; Na<sub>2</sub>SO<sub>4</sub>, 0.5; KH<sub>2</sub>PO<sub>4</sub>, 1.0; NaHCO<sub>3</sub>, 8; urea, 350; D-glucose, 5; and trimethylamine oxide (TMAO), 72 (Fellner and Parker, 2002). The complete buffer contained 2.5 mmol l<sup>-1</sup> calcium (normal concentration in the shark), whereas no CaCl<sub>2</sub> was added to the nominally calcium-free buffer. Unless otherwise specified, the Ca<sup>2+</sup> concentration in the buffer was 2.5 mmol l<sup>-1</sup>. The anterior mesenteric artery was minced into pieces <0.5 mm in size and then loaded with the Ca<sup>2+</sup>-sensitive fluorescent dye, fura-2AM. Cytosolic [Ca<sup>2+</sup>]<sub>i</sub> was measured as previously described (Fellner and Arendshorst, 2000, 2002; Fellner and Parker, 2002). Arterial tissue was placed in an open static chamber and examined in a small window of the optical field of a ×40 oil-immersion fluorescence objective of an inverted microscope (Olympus IX70, Tokyo, Japan). Approximately 5–6 typical elongated vascular smooth muscle cells were selected for analysis. The tissue was excited alternately with light of 340 and 380 nm wavelengths from a dual-excitation wavelength Delta-Scan equipped with dual monochrometers and a chopper (Photon Technology International, NJ, USA). After passing signals through a barrier filter (510 nm), fluorescence was detected by a photomultiplier tube. The calibration of [Ca<sup>2+</sup>]<sub>i</sub> was based on the signal ratio at 340/380 nm and known concentrations of Ca<sup>2+</sup> (Grynkiwicz et al., 1985) and was performed prior to initiating the experimental protocol.

The concentrations of ET-1, IRL 1620 and SRX that we employed in each experiment were 2 × 10<sup>-7</sup> mol l<sup>-1</sup>, a concentration at least twice the maximal stimulatory concentrations reported in the literature (Just et al., 2004; Touyz et al., 1995; Shimoda et al., 2000; Yanagisawa et al., 1988; Cavarape et al., 2003; Batra et al., 1993). The concentrations of antagonists were at least tenfold greater than that of the agonists and were also chosen on the basis of values reported in the literature.

### Reagents

TMAO, Ruthenium Red, 8-Br cADPR, 8-(*N,N*-diethylamino) octyl 3,4,5-trimethoxybenzoate (TMB-8) and 2-aminoethyl diphenyl borate (2-APB) were purchased from Sigma (St Louis, MO, USA), ET-1 and IRL-1620 from California Peptide Research (Napa, CA, USA), ryanodine from Calbiochem (San Diego, CA, USA), sarafotoxin S6c from American Peptide (Sunnyvale, CA, USA) and fura-2AM from Teflab (Austin, TX, USA).

### Statistics

The data are presented as means ± standard error of the mean (S.E.M.). Each data set is derived from tissue originating from at least three different sharks. Paired data sets were tested using Student's paired *t*-test. Multiple comparisons were analyzed using one-way analysis of variance (ANOVA) for repeated measures followed by Student–Neuman–Kuels *post hoc* test. *P* < 0.05 was considered statistically significant.

### Results

#### *Response to IRL-1620, sarafotoxin S6c and endothelin-1 in Ca<sup>2+</sup>-free Ringer*

Endothelin is a ligand for both the ET<sub>A</sub>R and ET<sub>B</sub>R. There are a number of specific agonists for the ET<sub>B</sub>R but, to date, no specific agonist has been found for the ET<sub>A</sub>R. To confirm that the anterior mesenteric artery of the dogfish shark responds to ET<sub>B</sub>R but not ET<sub>A</sub>R stimulation, we measured the [Ca<sup>2+</sup>]<sub>i</sub> response to two specific ET<sub>B</sub>R agonists, IRL 1620 and SRX, in Ca<sup>2+</sup>-free Ringer. IRL 1620 increased [Ca<sup>2+</sup>]<sub>i</sub> by 89 ± 26 nmol l<sup>-1</sup> (*N* = 19, *P* < 0.01 compared to baseline); the increase in [Ca<sup>2+</sup>]<sub>i</sub> following SRX was 76 ± 11 nmol l<sup>-1</sup>, which was not different from the response produced by IRL 1620 (*N* = 10, *P* = 0.34 for IRL *vs* SRX). ET-1 alone increased [Ca<sup>2+</sup>]<sub>i</sub> by 79 ± 15 (*N* = 6, *P* < 0.05 *vs* IRL 1620 or SRX), demonstrating that ET-1, a combined ET<sub>A</sub>R and ET<sub>B</sub>R agonist had the same effect on increasing [Ca<sup>2+</sup>]<sub>i</sub> in VSM as the selective ET<sub>B</sub>R agonists, IRL 1620 and SRX (Fig. 1A).

In VSM known to have both ET<sub>A</sub>R and ET<sub>B</sub>R, stimulation first by IRL 1620 produces a peak response similar to that in shark mesenteric artery; however, subsequent addition of ET-1 causes a second peak, which is about twice the magnitude of the IRL 1620-induced peak (Fellner and Arendshorst, 2004), showing that initial application of ET<sub>B</sub>R agonists does not cause ET<sub>A</sub>R desensitization, at least in rat VSM. It is conceivable that substantial differences exist between mammalian and fish VSM. To further demonstrate that ET-1 activates ET<sub>B</sub>R but not ET<sub>A</sub>R in shark VSM, we treated the VSM with IRL 1620; at the nadir of the response we added ET-1. Fig. 1B, a representative tracing of the response of mesenteric artery VSM to IRL 1620, illustrates the typical pattern in the shark mesenteric artery VSM of a rise to a peak over a 10–20 s period and an unusually long peak duration of nearly 100 s. When ET-1 was added at the nadir of the [Ca<sup>2+</sup>]<sub>i</sub> response to IRL 1620, there was no further significant

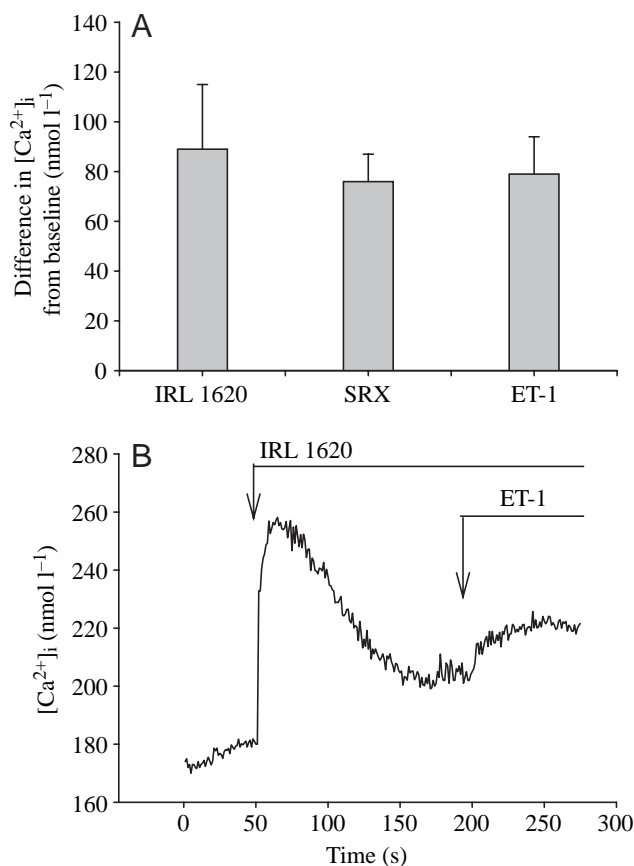

Fig. 1. Intracellular Ca<sup>2+</sup> ([Ca<sup>2+</sup>]<sub>i</sub>) responses of shark VSM to ET<sub>B</sub>R receptor agonists and endothelin-1 (ET-1). (A) The ET<sub>B</sub>R agonists IRL 1620 and sarafotoxin S6c (SRX) produce the same increase in [Ca<sup>2+</sup>]<sub>i</sub> as ET-1. (B) Representative tracing of the cytosolic calcium responses of shark anterior mesenteric artery VSM. The ET<sub>B</sub>R agonist IRL 1620 causes a prompt increase in [Ca<sup>2+</sup>]<sub>i</sub>. In the continued presence of IRL 1620, addition of ET-1 does not cause any further significant peak increase in [Ca<sup>2+</sup>]<sub>i</sub>.

increase in [Ca<sup>2+</sup>]<sub>i</sub>; the absolute value of the IRL 1620 peak was 366±22, the nadir was 270±31 and that of the subsequent ET-1 peak 282±30 nmol l<sup>-1</sup> ( $N=8$ ,  $P=0.78$  for ET-1 vs IRL 1620 nadir). These results suggest but do not prove with certainty that ET<sub>B</sub>R is the exclusive ET-1 receptor in *S. acanthias*.

#### Response to IRL-1620 and endothelin-1 in Ca<sup>2+</sup>-Ringer

To confirm that the [Ca<sup>2+</sup>]<sub>i</sub> responses to IRL 1620 and ET-1 were not different in Ringer containing Ca<sup>2+</sup> (Ca<sup>2+</sup>-Ringer) compared to Ca<sup>2+</sup>-free Ringer, that is, both in the presence of Ca<sup>2+</sup> mobilization and entry and without the possibility that SR depletion of Ca<sup>2+</sup> was an issue, we performed experiments in Ca<sup>2+</sup>-Ringer. The increase in [Ca<sup>2+</sup>]<sub>i</sub> from baseline following IRL 1620 was 149±12 nmol l<sup>-1</sup> ( $N=7$ ) and that following ET-1 was 146±20 nmol l<sup>-1</sup> ( $N=5$ ), demonstrating again that only ET<sub>B</sub> receptor activity is present in shark VSM (data not shown).

#### Evidence for activation of the IP<sub>3</sub> receptor

Having established that stimulation of ET<sub>B</sub>R but not ET<sub>A</sub>R mobilized [Ca<sup>2+</sup>]<sub>i</sub> from the SR, we investigated the mechanisms by which this occurs. To determine if ET<sub>B</sub>R-coupled G protein activation results in formation of IP<sub>3</sub>, activation of the IP<sub>3</sub>R and mobilization of Ca<sup>2+</sup> from the SR, we tested two inhibitors of the IP<sub>3</sub>R in nominally Ca<sup>2+</sup>-free Ringer. In the presence of TMB-8 (10<sup>-5</sup> mol l<sup>-1</sup>; Palade et al., 1989), IRL 1620 increased [Ca<sup>2+</sup>]<sub>i</sub> by only 26.8±8 nmol l<sup>-1</sup> ( $N=8$ ,  $P<0.01$  vs IRL without TMB-8). The compound 2-APB not only inhibits the IP<sub>3</sub>R but also blocks Ca<sup>2+</sup> entry *via* a store-operated Ca<sup>2+</sup> entry channel in mammals (Broad et al., 2001; Maruyama et al., 1997) and in the dogfish shark (Fellner and Parker, 2002). In Ca<sup>2+</sup>-free Ringer, only the effect on the IP<sub>3</sub>R can occur. At concentrations of greater than 100 μmol l<sup>-1</sup>, 2-APB can inhibit the SR/ER Ca<sup>2+</sup>-ATPase (SERCA), leading to a rise of [Ca<sup>2+</sup>]<sub>i</sub> (Peppiatt et al., 2003). In the presence of 2-APB (50 μmol l<sup>-1</sup>) there was no change in baseline [Ca<sup>2+</sup>]<sub>i</sub> ( $P=0.88$ ) and the [Ca<sup>2+</sup>]<sub>i</sub> response to IRL-1620 was reduced to 25.3±8 nmol l<sup>-1</sup> ( $N=10$ ,  $P<0.01$  vs IRL without 2-APB). Thus TMB-8 and 2-APB inhibited the IRL 1620 response by 71% (Fig. 2A,B).

#### Evidence for activation of the ryanodine receptor by cADPR

Cyclic ADP-ribose is synthesized from NAD by the action of cADPR, which then stimulates the RyR to release Ca<sup>2+</sup> from the endoplasmic/sarcoplasmic reticulum in sea urchin eggs and a variety of mammalian cell types (Guse, 2000; Lee, 2001). If the same systems operate in the shark, one might anticipate that ET<sub>B</sub>R agonist stimulation of shark VSM would cause activation of the ADPR cyclase, formation of cADPR and opening of the RyR to release Ca<sup>2+</sup> from the SR. To investigate this possibility, we treated VSM with 8-Br cADPR (1 μmol l<sup>-1</sup>), a cell-permeant inhibitor of activation of the RyR. The [Ca<sup>2+</sup>]<sub>i</sub> response to IRL 1620 was reduced to 53±8 nmol l<sup>-1</sup> ( $N=16$ ,  $P<0.01$  for IRL alone vs IRL with 8-Br cADPR). 8-Br cADPR alone caused an increase in [Ca<sup>2+</sup>]<sub>i</sub> of 16±6 nmol l<sup>-1</sup>, which was not different from baseline values. Fig. 3A is a representative tracing of the response of shark VSM to IRL 1620 in the presence of 8-Br cADPR.

To further address the participation of the RyR in the response to activation of the ET<sub>B</sub>R, we treated shark VSM in Ca<sup>2+</sup>-free Ringer with lower concentrations of ryanodine (5 μmol l<sup>-1</sup>) to activate rather than close the RyR. This concentration of ryanodine increased [Ca<sup>2+</sup>]<sub>i</sub> by 49±8 nmol l<sup>-1</sup> from baseline values ( $N=14$ ,  $P<0.01$ ). Subsequent addition of IRL 1620 further increased [Ca<sup>2+</sup>]<sub>i</sub> by only 28±6 nmol l<sup>-1</sup> (Fig. 3B,C). This value is significantly lower than that achieved by IRL 1620 following inhibition of the RyR with 100 μmol l<sup>-1</sup> ryanodine, Ruthenium Red (*vide infra*) and 8-Br cADPR ( $P=0.02$ ). Ryanodine at high concentrations (>>10 μmol l<sup>-1</sup>) locks the RyR in a closed state (Carroll et al., 1991). Ryanodine (100 μmol l<sup>-1</sup>) did not change baseline values of [Ca<sup>2+</sup>]<sub>i</sub> ( $N=11$ ,  $P=0.47$ ). Subsequent addition of IRL 1620 increased [Ca<sup>2+</sup>]<sub>i</sub> by 54.3±5 nmol l<sup>-1</sup> ( $N=11$ ,  $P=0.01$  vs IRL 1620 without ryanodine; Fig. 3B). When shark anterior

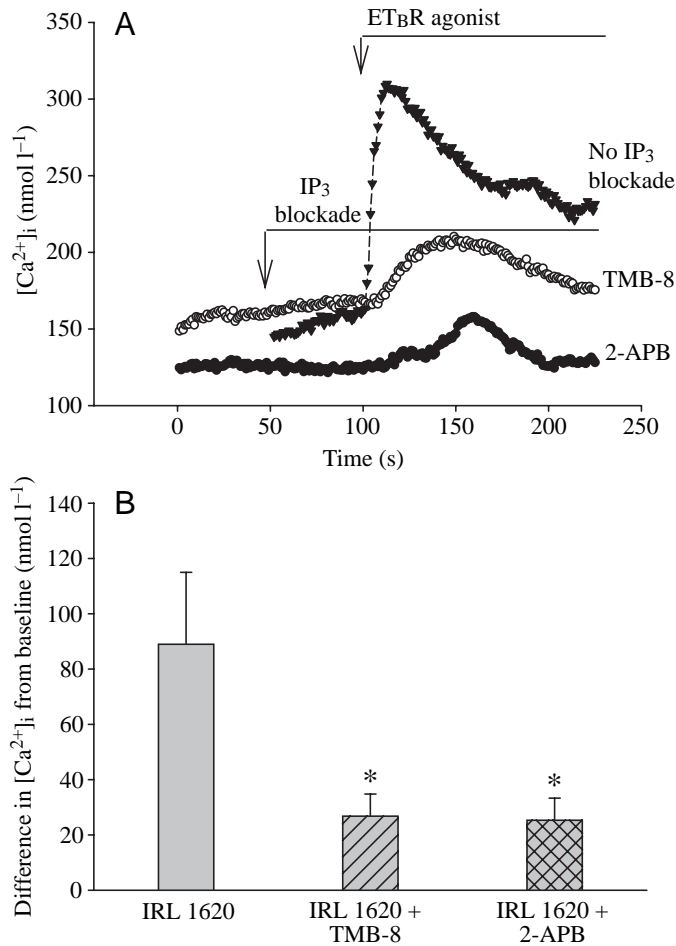

Fig. 2. Effect of the IP<sub>3</sub>R blockers, TMB-8 and 2-APB, on the response of shark VSM to the ET<sub>B</sub>R agonist IRL 1620 in Ca<sup>2+</sup>-free Ringer. (A) Representative tracings of the response of VSM to ET<sub>B</sub>R agonist stimulation in the presence or absence of TMB-8 or 2-APB. (B) Both inhibitors block the  $[Ca^{2+}]_i$  mobilization response by about 70% (\* $P < 0.01$ ).

mesenteric artery VSM was pretreated with Ruthenium Red (50  $\mu\text{mol l}^{-1}$ ), an inhibitor of the RyR, basal  $[Ca^{2+}]_i$  was unchanged and the addition of IRL 1620 caused an increase in  $[Ca^{2+}]_i$  of  $57 \pm 5 \text{ nmol l}^{-1}$  ( $N=6$ ,  $P < 0.05$  vs IRL 1620 without Ruthenium Red). Taken together, the three inhibitors of the RyR diminished the response of VSM to IRL 1620 by a mean of 39% (Fig. 3D).

### Discussion

In mammals, the ET<sub>A</sub>R is considered to be the predominant endothelin receptor subtype responsible for vasoconstriction in VSM. In rats, ET<sub>B</sub>R agonists failed to induce vasoconstriction in pulmonary artery, carotid artery or renal artery (Evans et al., 1999; Marano et al., 1999; Seo and Luscher, 1995). However, in small mesenteric arteries, ET<sub>B</sub>R accounted for about one half of the  $[Ca^{2+}]_i$  response to ET-1 (Touyz et al., 1995) and in afferent arterioles, ET<sub>B</sub>R were responsible for about one

third of the ET-induced increase in  $[Ca^{2+}]_i$  (Fellner and Arendshorst, 2004). Activation of both ET<sub>A</sub>R and ET<sub>B</sub>R appears to constrict renal afferent arterioles whereas primarily ET<sub>B</sub>R stimulation constricted the efferent arteriole (Cavarape et al., 2003; Endlich et al., 1996). The dogfish shark appears to be unique in that ET-1 stimulation of vascular contraction in dorsal aorta and anterior mesenteric artery (Evans et al., 1996; Evans, 2001), or of increases in  $[Ca^{2+}]_i$  in anterior mesenteric artery, occurred exclusively *via* ET<sub>B</sub>R activation (this study). Evidence for ET<sub>B</sub>R in teleost fish VSM was demonstrated in the bulbus arteriosus of the eel *Anguilla rostrata* in studies where there was dose-dependent constriction to ET-1 and SRX (Evans et al., 2003).

Having confirmed that ET<sub>B</sub>R and not ET<sub>A</sub>R seems to be the ET-1 subtype responsible for stimulating a rise in  $[Ca^{2+}]_i$  in the anterior mesenteric artery of the dogfish VSM, we investigated the Ca<sup>2+</sup> signaling pathways by which ET<sub>B</sub>R activation elevates  $[Ca^{2+}]_i$ . To evaluate the participation of IP<sub>3</sub>-mediated release of Ca<sup>2+</sup> from the SR, we employed two inhibitors of the IP<sub>3</sub>R, TMB-8 and 2-APB (50  $\mu\text{mol l}^{-1}$ ). In Ca<sup>2+</sup>-free shark Ringer, these agents inhibited the response to ET<sub>B</sub>R agonist stimulation by 71%. Although 2-APB has actions other than blockade of the IP<sub>3</sub>R, in Ca<sup>2+</sup>-free Ringer, store-operated Ca<sup>2+</sup> entry cannot occur. While 2-APB can block SERCA Ca<sup>2+</sup>-ATPase, it is reported to do so only at concentrations greater than 100  $\mu\text{mol l}^{-1}$  (Peppiatt et al., 2003). TMB-8 has proven to be a reliable blocker of the IP<sub>3</sub>R in VSM in the rat (Salomonsson and Arendshorst, 2001; Purdy and Arendshorst, 2001).

In mammalian VSM, the RyR participates in the process of Ca<sup>2+</sup> mobilization following agonist stimulation of VSM. Stimulation of the RyR can occur *via* several separate mechanisms: calcium-induced calcium release (CICR) is a process by which an elevation of  $[Ca^{2+}]_i$  (e.g. following activation of the IP<sub>3</sub>R or entry through a voltage-gated Ca<sup>2+</sup> channel) is thought to stimulate the RyR, thereby augmenting the signal (Galione and Churchill, 2002; Lee, 1993); alternatively, IP<sub>3</sub> may enhance ryanodine or cADPR binding to the RyR, creating a site of crosstalk between the two signaling pathways (Yusufi et al., 2002). Another mechanism involves the effect of cADPR on the RyR; cADPR-sensitive Ca<sup>2+</sup> stores have been described in a broad variety of cell types in rat and mouse (Lee, 2001). In mammals, cADPR is both synthesized and hydrolyzed by the bifunctional protein CD38 (White et al., 2003). There are only two reports of cADPR activity in fish, both in oocytes (Fluck et al., 1999; Polzonetti et al., 2002). The current study is the first to demonstrate activity of cADPR in VSM of an elasmobranch, *S. acanthias*. Utilizing three different inhibitors of the RyR, including 8-Br cADPR, we found that the response to ET<sub>B</sub>R agonist stimulation in Ca<sup>2+</sup>-free shark Ringer was inhibited by 39%. These data are the first to demonstrate that the RyR participates in the elevation of  $[Ca^{2+}]_i$  that is ultimately responsible for vascular contraction in the dogfish shark. Whether endothelin-1 directly activates the ADPR cyclase to form cADPR in the shark has not yet been studied in VSM of any species.

That the sum of inhibition achieved by inhibitors of IP<sub>3</sub>R



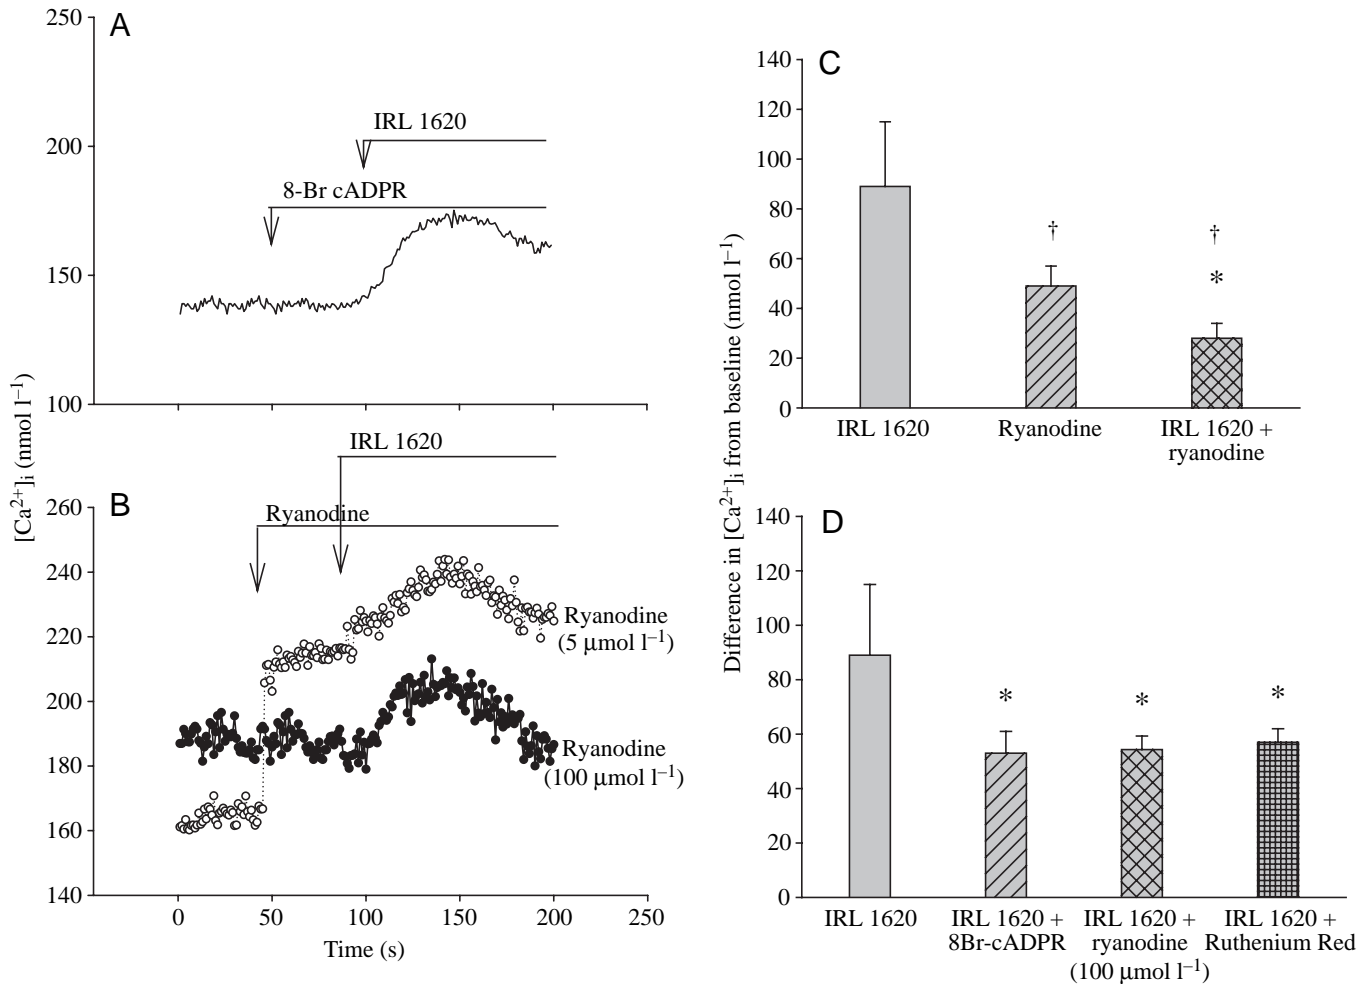

Fig. 3. Participation of the RyR in the [Ca<sup>2+</sup>]<sub>i</sub> response to the ET<sub>B</sub>R agonist IRL 1620 in shark mesenteric VSM. (A) Representative tracing of the diminished [Ca<sup>2+</sup>]<sub>i</sub> response to IRL 1620 in the continued presence of the cADPR antagonist 8-Br cADPR. (B) Typical tracings of the stimulatory effect of a low concentration of ryanodine on the RyR and blocking effect of high concentrations of ryanodine. IRL 1620 was added in the continued presence of ryanodine. (C) Summary data of the response of VSM to a concentration of ryanodine that activates the RyR (5 μmol l<sup>-1</sup>), followed by response to the ET<sub>B</sub>R agonist IRL 1620 in the continued presence of ryanodine. The ryanodine and IRL 1620 plus ryanodine results were different from each other (\**P*<0.05) and both were different from IRL 1620 alone (*P*<0.05). (D) Three inhibitors of the RyR, 8Br-cADPR, high concentration of ryanodine (100 μmol l<sup>-1</sup>) and Ruthenium Red, block the response of VSM to the ET<sub>B</sub>R agonist IRL 1620 by approximately 39% (\**P*<0.01).

and RyR was greater than 100% raises the question of whether there is communication between the IP<sub>3</sub>R- and RyR-responsive compartments within the SR. In canine pulmonary artery, for example, the SR of VSM appears to have two spatially distinct compartments, whereas in renal artery they communicate (Janiak et al., 2001), demonstrating that there is heterogeneity of calcium stores in vascular beds of a single species. Future studies will be required to examine the compartmental organization of Ca<sup>2+</sup> stores in the shark SR.

The [Ca<sup>2+</sup>]<sub>i</sub> response of shark anterior mesenteric artery VSM to ET<sub>B</sub>R stimulation in Ca<sup>2+</sup>-free Ringer was characterized by a prolonged peak of approximately 100 s. This contrasts with the short duration spike (<25 s) typical of the responses seen in mammalian VSM (Schroeder et al., 2000). The current studies were performed intentionally at

20–21°C, because shark cells are accustomed to ambient temperatures of 13–17°C in the sea, and our experience is that they lose viability at temperatures above 25°C. It has previously been shown that the removal of Ca<sup>2+</sup> from the cytosol in mammalian cells is prolonged at reduced temperatures (13–27°C; Shuttleworth and Thompson, 1991), which may explain the long-duration peak response that we observed.

Previous studies of dogfish ventral aorta demonstrated that acetylcholine produced a concentration-dependent contraction of vascular rings whether or not the endothelium was intact (Evans and Gunderson, 1998). Furthermore, L-arginine, sodium nitroprusside and nitric oxide (NO) produced significant contractions, a finding opposite to that produced in mammalian VSM, in which dilation occurs with these

substances. More recently, it has been shown that there is evidence for a vasodilatory effect of NO in *S. acanthias* *in vivo*, in animals that were made severely hypoxic (E. Swenson, unpublished results). These results suggest that under ordinary conditions, endothelial cell ET<sub>B</sub>R has little or no role in vascular homeostasis in *S. acanthias*.

One might ask if ET<sub>B</sub>R is the only ET-1 receptor type in elasmobranchs. In shark rectal gland tubules, ET-1 regulates the xenobiotic efflux pump multidrug resistance-associated protein isoform 2 (MRP2). Inhibitors of ET<sub>B</sub>R but not ET<sub>A</sub>R prevented transport (Miller et al., 2002). The gill of the dogfish shark appears to express only ET<sub>B</sub>R; the ET<sub>B</sub>R-specific agonists IRL 1620, SRX and BQ-3020 competed against <sup>125</sup>I-ET-1 at a single site (Evans and Gunderson, 1999). A band of muscle tissue has been identified on the periphery of the shark rectal gland. ET-1 constricted the smooth muscle but the ET<sub>B</sub>R agonist SRX did not, suggesting that ET<sub>A</sub>R might be the receptor involved (Evans and Piermarini, 2001). Inhibitors of ET<sub>A</sub>R were not tried. It appears that ET<sub>B</sub>R is an ancient receptor and that ET<sub>A</sub>R, now generally considered to be the major vasoconstrictive sub-type of ET-1 in mammals, is a more recent evolutionary event.

In summary, we have established for the first time in VSM of the elasmobranch *Squalus acanthias* that stimulation of the ET<sub>B</sub>R mobilizes Ca<sup>2+</sup> from the SR *via* activation of both IP<sub>3</sub>R and RyR and that cADPR participates in the signaling process. We have confirmed that ET<sub>B</sub>R but not ET<sub>A</sub>R may be the exclusive receptor for the endothelin in shark VSM.

#### List of abbreviations

|                                      |                                                   |
|--------------------------------------|---------------------------------------------------|
| cADPR                                | cyclic ADP-ribose                                 |
| CICR                                 | calcium-induced calcium release                   |
| ER                                   | endoplasmic reticulum                             |
| ET                                   | endothelin                                        |
| ET-1                                 | endothelin-1                                      |
| ET <sub>A</sub> R, ET <sub>B</sub> R | endothelin A and B receptors                      |
| IP <sub>3</sub>                      | inositol trisphosphate                            |
| IP <sub>3</sub> R                    | IP <sub>3</sub> receptor                          |
| MRP2                                 | multidrug resistance-associated protein isoform 2 |
| NAD                                  | nicotinamide adenine dinucleotide                 |
| NO                                   | nitric oxide                                      |
| RyR                                  | ryanodine-sensitive receptor                      |
| SERCA                                | SR/ER Ca <sup>2+</sup> -ATPase                    |
| SR                                   | sarcoplasmic reticulum                            |
| SRX                                  | sarafotoxin S6c                                   |
| TMAO                                 | trimethylamine oxide                              |
| VSM                                  | vascular smooth muscle                            |

This study was supported by a grant from the Thomas H. Maren Foundation.

#### References

Barone, F., Genazzani, A. A., Conti, A., Churchill, G. C., Palombi, F., Ziparo, E., Sorrentino, V., Galione, A. and Filippini, A. (2002). A pivotal

- role for cADPR-mediated Ca<sup>2+</sup> signaling: regulation of endothelin-induced contraction in peritubular smooth muscle cells. *FASEB J.* **16**, 697-705.
- Batra, V. K., McNeill, J. R., Xu, Y., Wilson, T. W. and Gopalkrishnan, V. (1993). ETB receptors on aortic smooth muscle cells of spontaneously hypertensive rats. *Am. J. Physiol.* **264**, C479-C484.
- Broad, L. M., Braun, F.-J., Lievreumont, J.-P., Bird, G. S., Kurosaki, T. and Putney, J. W. (2001). Role of the phospholipase C-inositol 1,4,5-trisphosphate pathway in calcium release-activated calcium current (*I<sub>crac</sub>*) and capacitative calcium entry. *J. Biol. Chem.* **274**, 32881-32888.
- Carroll, S., Skarmeta, J. G., Yu, X., Collins, K. D. and Inesi, G. (1991). Interdependence of ryanodine binding, oligomeric receptor interactions, and Ca<sup>2+</sup> release regulation in junctional sarcoplasmic reticulum. *Arch. Biochem. Biophys.* **290**, 239-247.
- Cavarape, A., Endlich, N., Assaloni, R., Bartoli, E., Steinhausen, M., Parekh, N. and Endlich, K. (2003). Rho-kinase inhibition blunts renal vasoconstriction induced by distinct signaling pathways *in vivo*. *J. Am. Soc. Nephrol.* **14**, 37-45.
- Conigrave, A. D., Quinn, S. J. and Brown, E. M. (2000). Cooperative multimodal sensing and therapeutic implications of the extracellular Ca<sup>2+</sup>-sensing receptor. *Trends Pharmacol. Sci.* **21**, 401-407.
- D'Orleans-Juste, P., Labonte, J., Bkailey, G., Choufani, S., Plante, M. and Honore, J. (2002). Function of the endothelin(B) receptor in cardiovascular physiology and pathophysiology. *Pharmacol. Ther.* **95**, 221-238.
- Endlich, K., Hoffend, J. and Steinhausen, M. (1996). Localization of endothelin ETA and ETB receptor-mediated constriction in the renal microcirculation of rats. *J. Physiol.* **497**, 211-218.
- Evans, A. M., Cobban, H. J. and Nixon, G. F. (1999). ET(A) receptors are the primary mediators of myofilament calcium sensitization induced by ET-1 in rat pulmonary artery smooth muscle: a tyrosine kinase independent pathway. *Br. J. Pharmacol.* **127**, 153-160.
- Evans, D. H. (2001). Vasoactive receptors in abdominal blood vessels of the dogfish shark, *Squalus acanthias*. *Physiol. Biochem. Zool.* **74**, 120-126.
- Evans, D. H. and Gunderson, M. P. (1998). A prostaglandin, not NO, mediated endothelium-dependent dilation in ventral aorta of shark. *Am. J. Physiol.* **274**, R1050-R1057. 1.
- Evans, D. H. and Gunderson, M. P. (1999). Characterization of an endothelin ET(B) receptor in the gill of the dogfish shark *Squalus acanthias*. *J. Exp. Biol.* **202**, 3605-3610.
- Evans, D. H. and Piermarini, P. M. (2001). Contractile properties of the elasmobranch rectal gland. *J. Exp. Biol.* **204**, 59-67.
- Evans, D. H., Gunderson, M. P. and Cegelis, C. (1996). ETB-type receptors mediate endothelin-stimulated contraction in the aortic vascular smooth muscle of the spiny dogfish shark, *Squalus acanthias*. *J. Comp. Physiol. B* **165**, 659-664.
- Evans, D. H., Harrie, A. C. and Kozlowski, M. S. (2003). Characterization of the effects of vasoactive substances on the bulbus arteriosus of the eel, *Anguilla rostrata*. *J. Exp. Zool.* **297A**, 45-51.
- Fellner, S. K. and Arendshorst, W. J. (2000). Ryanodine receptor and capacitative Ca<sup>2+</sup> entry in fresh glomerular vascular smooth muscle cells. *Kidney Internat.* **58**, 1686-1694.
- Fellner, S. K. and Arendshorst, W. J. (2002). Store-operated Ca<sup>2+</sup> entry is exaggerated in fresh glomerular vascular smooth muscle cells of SHR. *Kidney Internat.* **61**, 2132-2141.
- Fellner, S. K. and Arendshorst, W. J. (2004). Endothelin A and B receptors of glomerular vascular smooth muscle. *Kidney Internat.* **65**, 1810-1817.
- Fellner, S. K. and Parker, L. (2002). A Ca<sup>2+</sup>-sensing receptor modulates shark rectal gland function. *J. Exp. Biol.* **205**, 1889-1897.
- Fluck, R., Abraham, V., Miller, A. and Galione, A. (1999). Microinjection of cyclic ADP-ribose triggers a regenerative wave of Ca<sup>2+</sup> release and exocytosis of cortical alveoli in medaka eggs. *Zygote* **7**, 285-292.
- Galione, A. and Churchill, G. C. (2002). Interactions between calcium release pathways: multiple messengers and multiple stores. *Cell Calcium* **32**, 343-354.
- Giulumian, A. D., Meszaros, L. G. and Fuchs, L. C. (2000). Endothelin-1-induced contraction of mesenteric small arteries is mediated by ryanodine receptor Ca<sup>2+</sup> channels and cyclic ADP-ribose. *J. Cardiovasc. Pharmacol.* **36**, 758-763.
- Gryniewicz, G., Poenie, M. and Tsien, R. Y. (1985). A new generation of Ca<sup>2+</sup> indicators with greatly improved fluorescence properties. *J. Biol. Chem.* **260**, 3440-3450.
- Guse, A. H. (2000). Cyclic ADP-ribose. *J. Mol. Med.* **78**, 26-35.
- Janiak, R., Wilson, S. M., Montague, S. and Hume, J. R. (2001). Heterogeneity of calcium stores and elementary release events in canine pulmonary arterial smooth muscle cells. *Am. J. Physiol.* **280**, C22-C33.

- Just, A., Olson, A. J. M. and Arendshorst, W. J.** (2004). Dual constrictor and dilator actions of  $ET_B$  receptors in the rat renal microcirculation: interactions with  $ET_A$  receptors. *Am. J. Physiol.* **286**, F660-F668.
- Lee, H. C.** (1993). Potentiation of calcium- and caffeine-induced calcium release by cyclic ADP-ribose. *J. Biol. Chem.* **268**, 293-299.
- Lee, H. C.** (2001). Physiological functions of cyclic ADP-ribose and NAADP as calcium messengers. *Annu. Rev. Pharmacol. Toxicol.* **41**, 317-345.
- Marano, G., Grigioni, M., Palazzesi, S. and Ferrari, A. U.** (1999). Endothelin and mechanical properties of the carotid artery in Wistar-Kyoto and spontaneously hypertensive rats. *Cardiovasc. Res.* **41**, 701-707.
- Maruyama, T., Kanaji, T., Nakade, S., Kanno, T. and Mikoshiba, K.** (1997). 2APB, 2-aminoethoxydiphenyl borate, a membrane-penetrable modulator of  $Ins(1,4,5)P_3$ -induced  $Ca^{2+}$  release. *J. Biochem. (Tokyo)* **122**, 498-505.
- Miller, D. S., Masereeuw, R. and Karnaky, K. J., Jr** (2002). Regulation of MRP2-mediated transport in shark rectal salt gland tubules. *Am. J. Physiol.* **282**, R774-R781.
- Palade, P., Dettbarn, C., Alderson, B. and Volpe, P.** (1989). Pharmacologic differentiation between inositol-1,4,5-trisphosphate-induced  $Ca^{2+}$  release and  $Ca^{2+}$ - or caffeine-induced  $Ca^{2+}$  release from intracellular membrane systems. *Mol. Pharmacol.* **36**, 673-680.
- Peppiatt, C. M., Collins, T. J., Mackenzie, L., Conway, S. J., Holmes, A. B., Bootman, M. D., Berridge, M. J., Seo, J. T. and Roderick, H. L.** (2003). 2-Aminoethoxydiphenyl borate (2-APB) antagonizes inositol 1,4,5-trisphosphate-induced calcium release, inhibits calcium pumps and has a use-dependent and slowly reversible action on store-operated calcium entry channels. *Cell Calcium* **34**, 97-108.
- Polzonetti, V., Cardinali, M., Moscani, G., Natalini, P., Meiri, I. and Carnelvali, O.** (2002). Cyclic ADPR and calcium signaling in sea bream (*Sparus aurata*) egg fertilization. *Mol. Reprod. Dev.* **61**, 213-217.
- Purdy, K. E. and Arendshorst, W. J.** (2001). Iloprost inhibits inositol-1,4,5-trisphosphate-mediated calcium mobilization stimulated by Angiotensin II in cultured preglomerular vascular smooth muscle cells. *J. Am. Soc. Nephrol.* **12**, 19-28.
- Salomonsson, M. and Arendshorst, W. J.** (2001). Norepinephrine-induced calcium signaling pathways in afferent arteriole of genetically hypertensive rats. *Am. J. Physiol.* **281**, F264-F272.
- Schroeder, A. C., Imig, J. D., LeBlanc, E. A., Pham, B. T., Pollock, D. M. and Inscho, E. W.** (2000). Endothelin-mediated calcium signaling in preglomerular smooth muscle cells. *Hypertension* **35**, 280-286.
- Seo, B. and Luscher, T. F.** (1995).  $ETA$  and  $ETB$  receptors mediate contraction to endothelin-1 in renal artery of aging SHR. Effects of FR139317 and bosentan. *Hypertension* **25**, 501-506.
- Shimoda, L. A., Sylvester, J. T. and Sham, J. S.** (2000). Mobilization of intracellular  $Ca^{2+}$  by endothelin-1 in rat intrapulmonary arterial smooth muscle cells. *Am. J. Physiol.* **278**, L157-L164.
- Shuttleworth, T. J. and Thompson, J. L.** (1991). Effect of temperature on receptor-activated changes in  $[Ca^{2+}]_i$  and their determination using fluorescent probes. *J. Biol. Chem.* **266**, 1410-1414.
- Thomas, M. J., Hamman, B. N. and Tibbits, G. F.** (1996). Dihydropyridine and ryanodine binding in ventricles from rat, trout, dogfish and hagfish. *J. Exp. Biol.* **199**, 1999-2009.
- Touyz, R. M., Deng, L. Y. and Schiffrin, E. L.** (1995). Endothelin subtype B receptor-mediated calcium and contractile responses in small arteries of hypertensive rats. *Hypertension* **26**, 1041-1045.
- White, T. A., Kannan, M. S. and Walseth, T. F.** (2003). Intracellular calcium signaling through the cADPR pathway is agonist specific in porcine airway smooth muscle. *FASEB J.* **17**, 482-484.
- Yanagisawa, M., Kurihara, H., Kimura, S., Tomobe, Y., Kobayashi, M., Mitsui, Y., Yazaki, Y., Gota, K. and Masaki, T.** (1988). A novel potent vasoconstrictor peptide produced by vascular endothelial cells. *Nature* **332**, 411-415.
- Yusufi, A. N., Cheng, J., Thompson, M. A., Burnett, J. C. and Grande, J. P.** (2002). Differential mechanisms of  $Ca^{2+}$  release from vascular smooth muscle cell microsomes. *Exp. Biol. Med. (Maywood)* **227**, 36-44.
